# Supplementary material for: The TriTryp Phosphatome: analysis of the protein phosphatase catalytic domains
Source: PubMed Central journal article supplement (PMC2175518; doi:10.1186/1471-2164-8-434), 2007-11-26

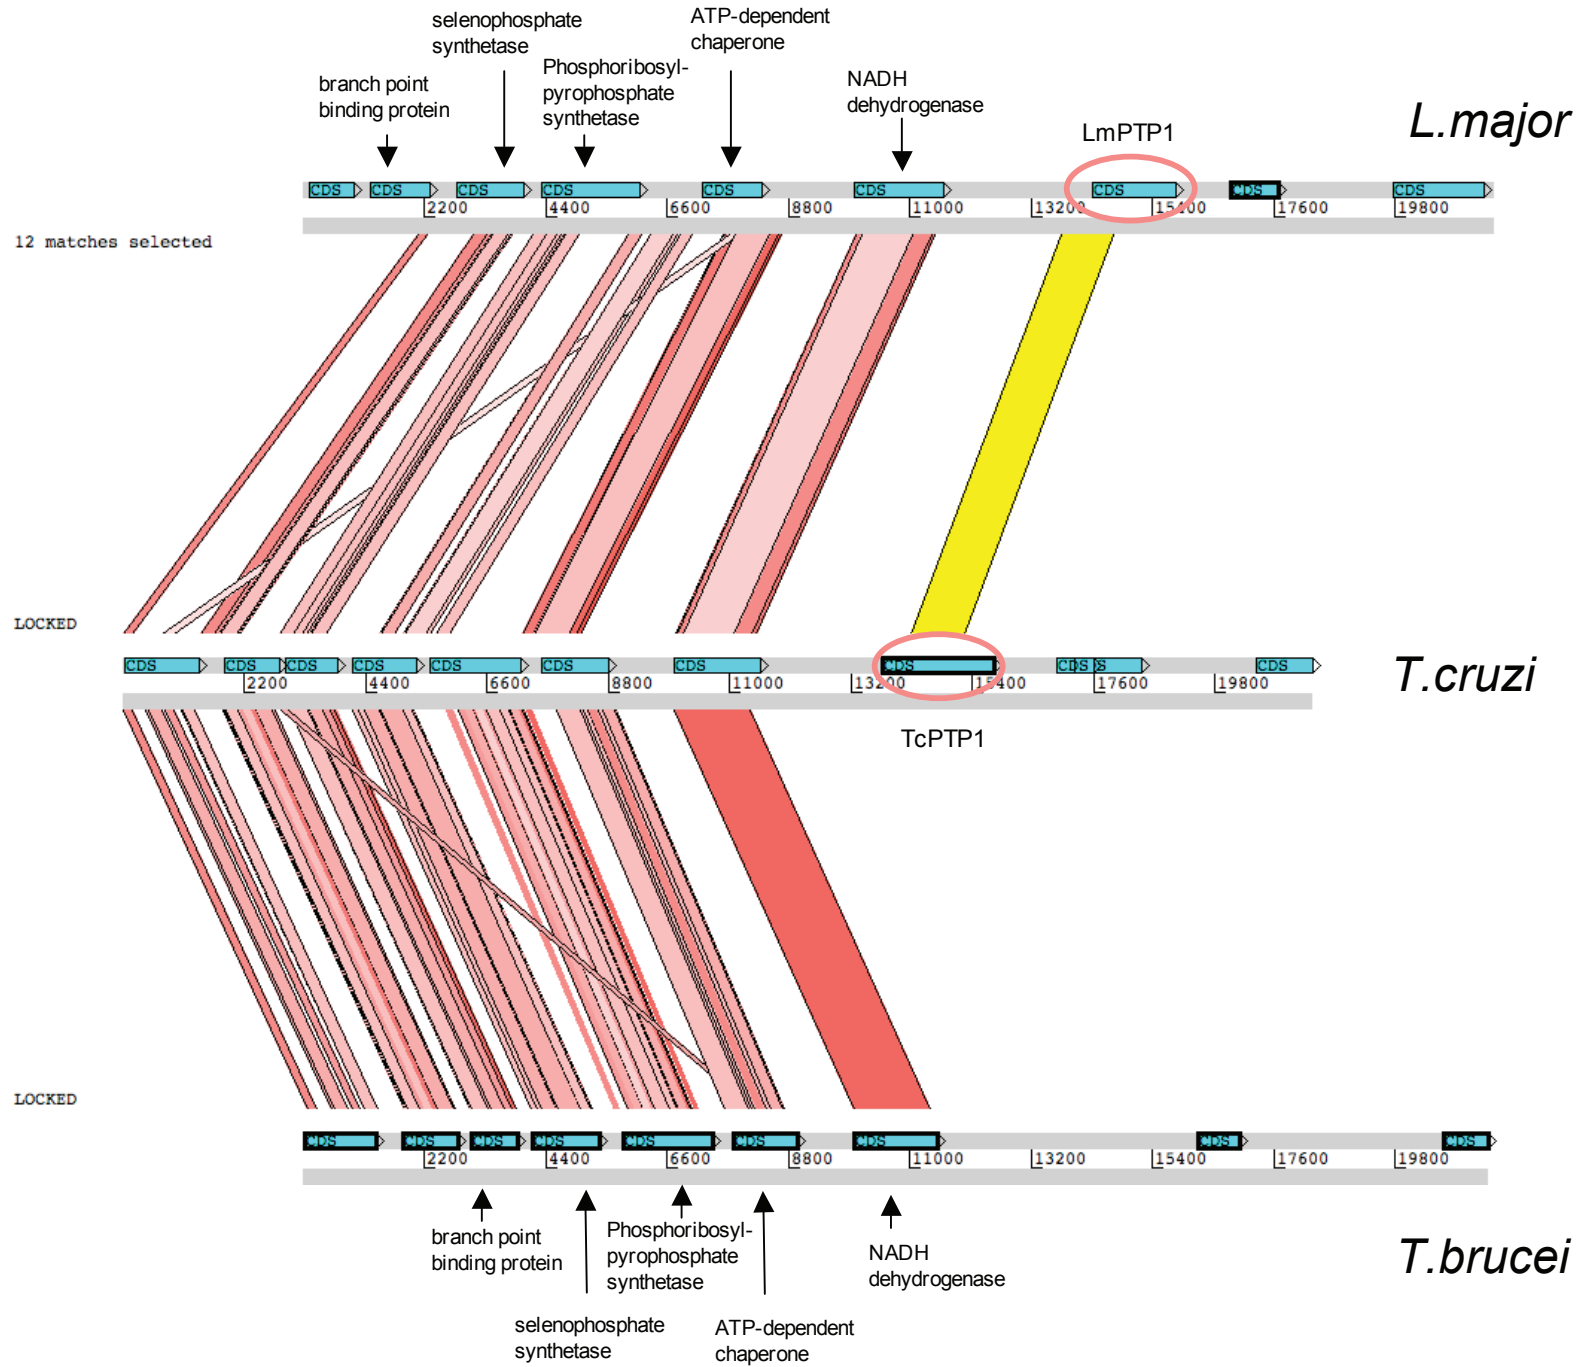

Supplement: 1471-2164-8-434-S3.pdf [file 1471-2164-8-434-S3.pdf]
