# Supplementary material for: The TriTryp Phosphatome: analysis of the protein phosphatase catalytic domains
Source: PubMed Central journal article supplement (PMC2175518; doi:10.1186/1471-2164-8-434), 2007-11-26

# ACR2 phosphatase

Hypothetical protein LmjF32.2740 Hypothetical protein

*Leishmania major*

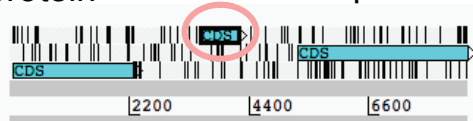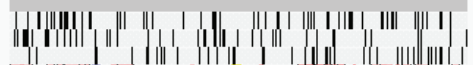

*Trypanosoma brucei*

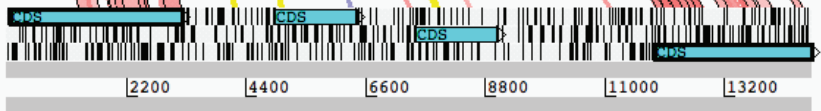

Hypothetical protein

Tb11.01.7590 Tb11.01.7600

Hypothetical protein

Amino acid transporters

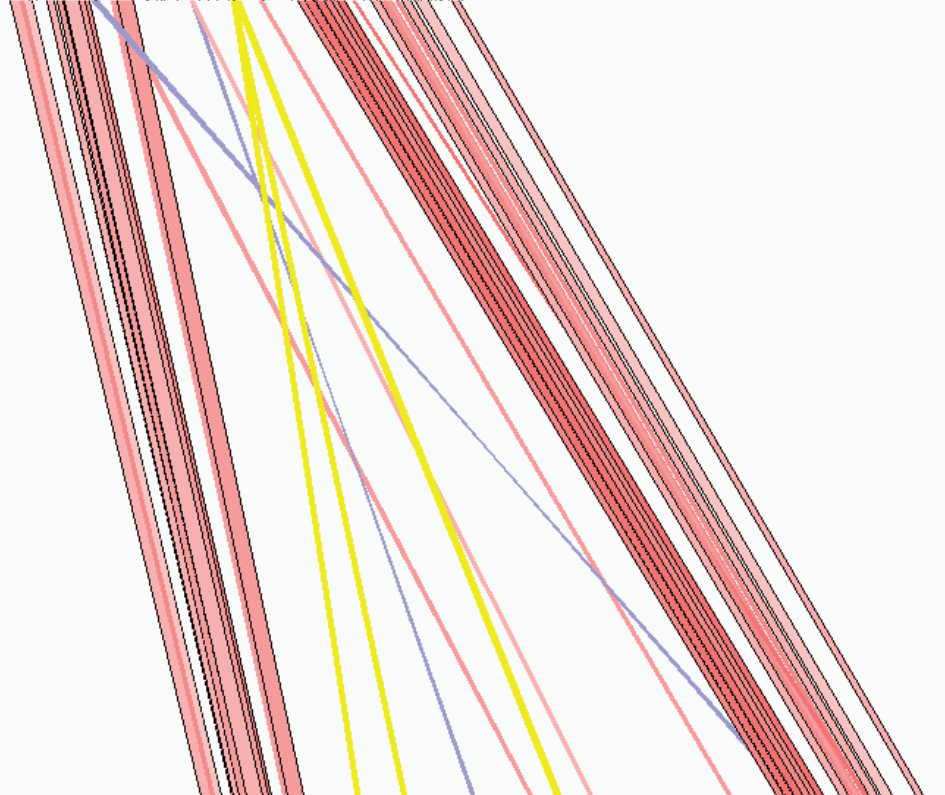

Supplement: 1471-2164-8-434-S7.pdf [file 1471-2164-8-434-S7.pdf]
